# Supplementary material for: A scenario for heart failure during the filling phase
Source: Springer Nature journal article supplement (doi:10.1038/s41598-024-74155-4), 2024-10-01
Supplement: MOESM1 [file 41598_2024_74155_MOESM1_ESM.pdf]

## SUPPLEMENTARY MATERIAL

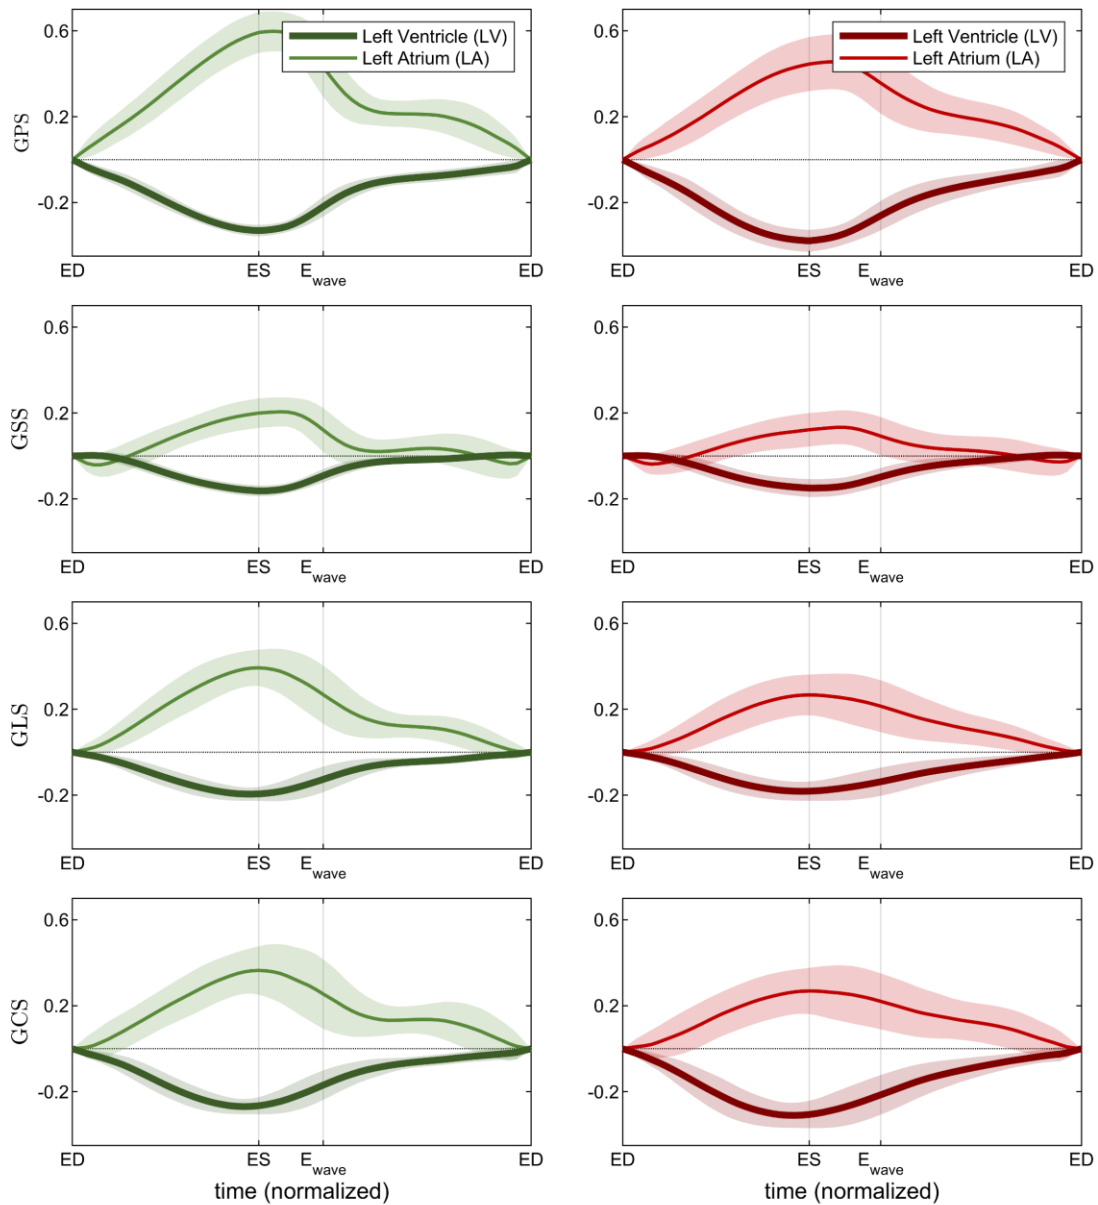

2

3 **Supplemental Figure S.1.** Time course of the different components of strain, in the left ventricle  
 4 (thick line) and in the left atrium (light line), the line reports the average value and the surrounding  
 5 shadow is  $\pm$  the standard deviation. From top to bottom: global principal strain (GPS), the average of  
 6 the highest strain (in absolute value); global secondary strain (GSS), the second principal strain;  
 7 global longitudinal strain (GLS), strain in the base-apex direction; global circumferential strain  
 8 (GCS), strain in the circumferential direction. Left column is evaluated from the normal population  
 9 (50 subjects), right column from the matched patient with hypertrophic cardiomyopathy (81 subjects).  
 10 Timing indicators are: ED=end diastole, ES=end systole, E<sub>wave</sub>=early filling wave.
